# Supplementary material for: Short-term fasting in glioma patients: analysis of diet diaries and metabolic parameters of the ERGO2 trial
Source: Eur J Nutr. 2021 Sep 6;61(1):477–87. doi: 10.1007/s00394-021-02666-1 (PMC8783850; doi:10.1007/s00394-021-02666-1)
Supplement: Supplementary file 1 — Supplementary file1 (DOCX 4890 KB) [file 394_2021_2666_MOESM1_ESM.docx]

**Supplementary Information**

**European Journal of Nutrition**

**Short-term fasting in glioma patients**

**– Analysis of diet diaries and metabolic parameters of the ERGO2 trial**

Martin Voss1,2,3,4, Katharina J. Wenger2,3,4,5, Nina von Mettenheim1,2,3,4, Jörg Bojunga6, Manuela Vetter1,2,3,4, Bianca Diehl1,2,3,4, Kea Franz2,3,4,7, Ruediger Gerlach8, Michael W. Ronellenfitsch1,2,3,4, Patrick N. Harter2,3,4,9, Elke Hattingen2,3,4,5, Joachim P. Steinbach1,2,3,4, Claus Rödel2,3,4,10 and Johannes Rieger1,11

1Dr. Senckenberg Institute of Neurooncology, University Hospital Frankfurt, Goethe University, Schleusenweg 2-16, 60528 Frankfurt/Main, Germany

2University Cancer Center Frankfurt (UCT), University Hospital Frankfurt, Goethe University, Theodor-Stern-Kai 7, 60590 Frankfurt/Main, Germany

3 German Cancer Consortium (DKTK), partner site Frankfurt/Mainz; and German Cancer Research Center (DKFZ), Stiftung des öffentlichen Rechts, Im Neuenheimer Feld 280, 69120 Heidelberg, Germany

4Frankfurt Cancer Institute (FCI), Georg-Speyer-Haus, Paul-Ehrlich-Straße 42-44, 60596 Frankfurt/Main, Germany

5Institute of Neuroradiology, University Hospital Frankfurt, Goethe University, Schleusenweg 2-16, 60528 Frankfurt/Main, Germany

6Department of Medicine 1, University Hospital Frankfurt, Goethe University, Theodor-Stern-Kai 7, 60590 Frankfurt/Main, Germany

7Department of Neurosurgery, University Hospital Frankfurt, Goethe University, Schleusenweg 2-16, 60528 Frankfurt/Main, Germany

8Department of Neurosurgery, HELIOS Hospital Erfurt, Nordhäuser Straße 74, 99089 Erfurt Germany

9Institute of Neurology (Edinger-Institute), University Hospital Frankfurt, Goethe University, Heinrich-Hoffmann Strasse 7, 60528 Frankfurt/Main, Germany

10Department of Radiotherapy and Oncology, University Hospital Frankfurt, Goethe University, Theodor-Stern-Kai 7, 60590 Frankfurt/Main, Germany

11Interdisciplinary Division of Neuro-Oncology, University Hospital Tübingen, Hoppe-Seyler-Straße 3, 72076 Tübingen, Germany

**Address for Correspondence**

Dr. Martin Voss

Dr. Senckenberg Institute of Neurooncology

Schleusenweg 2-16, 60528 Frankfurt am Main Germany

Mail: [martin.voss@kgu.de](mailto:martin.voss@kgu.de)

**Supplement Figure 1: Progression free survival and overall survival**


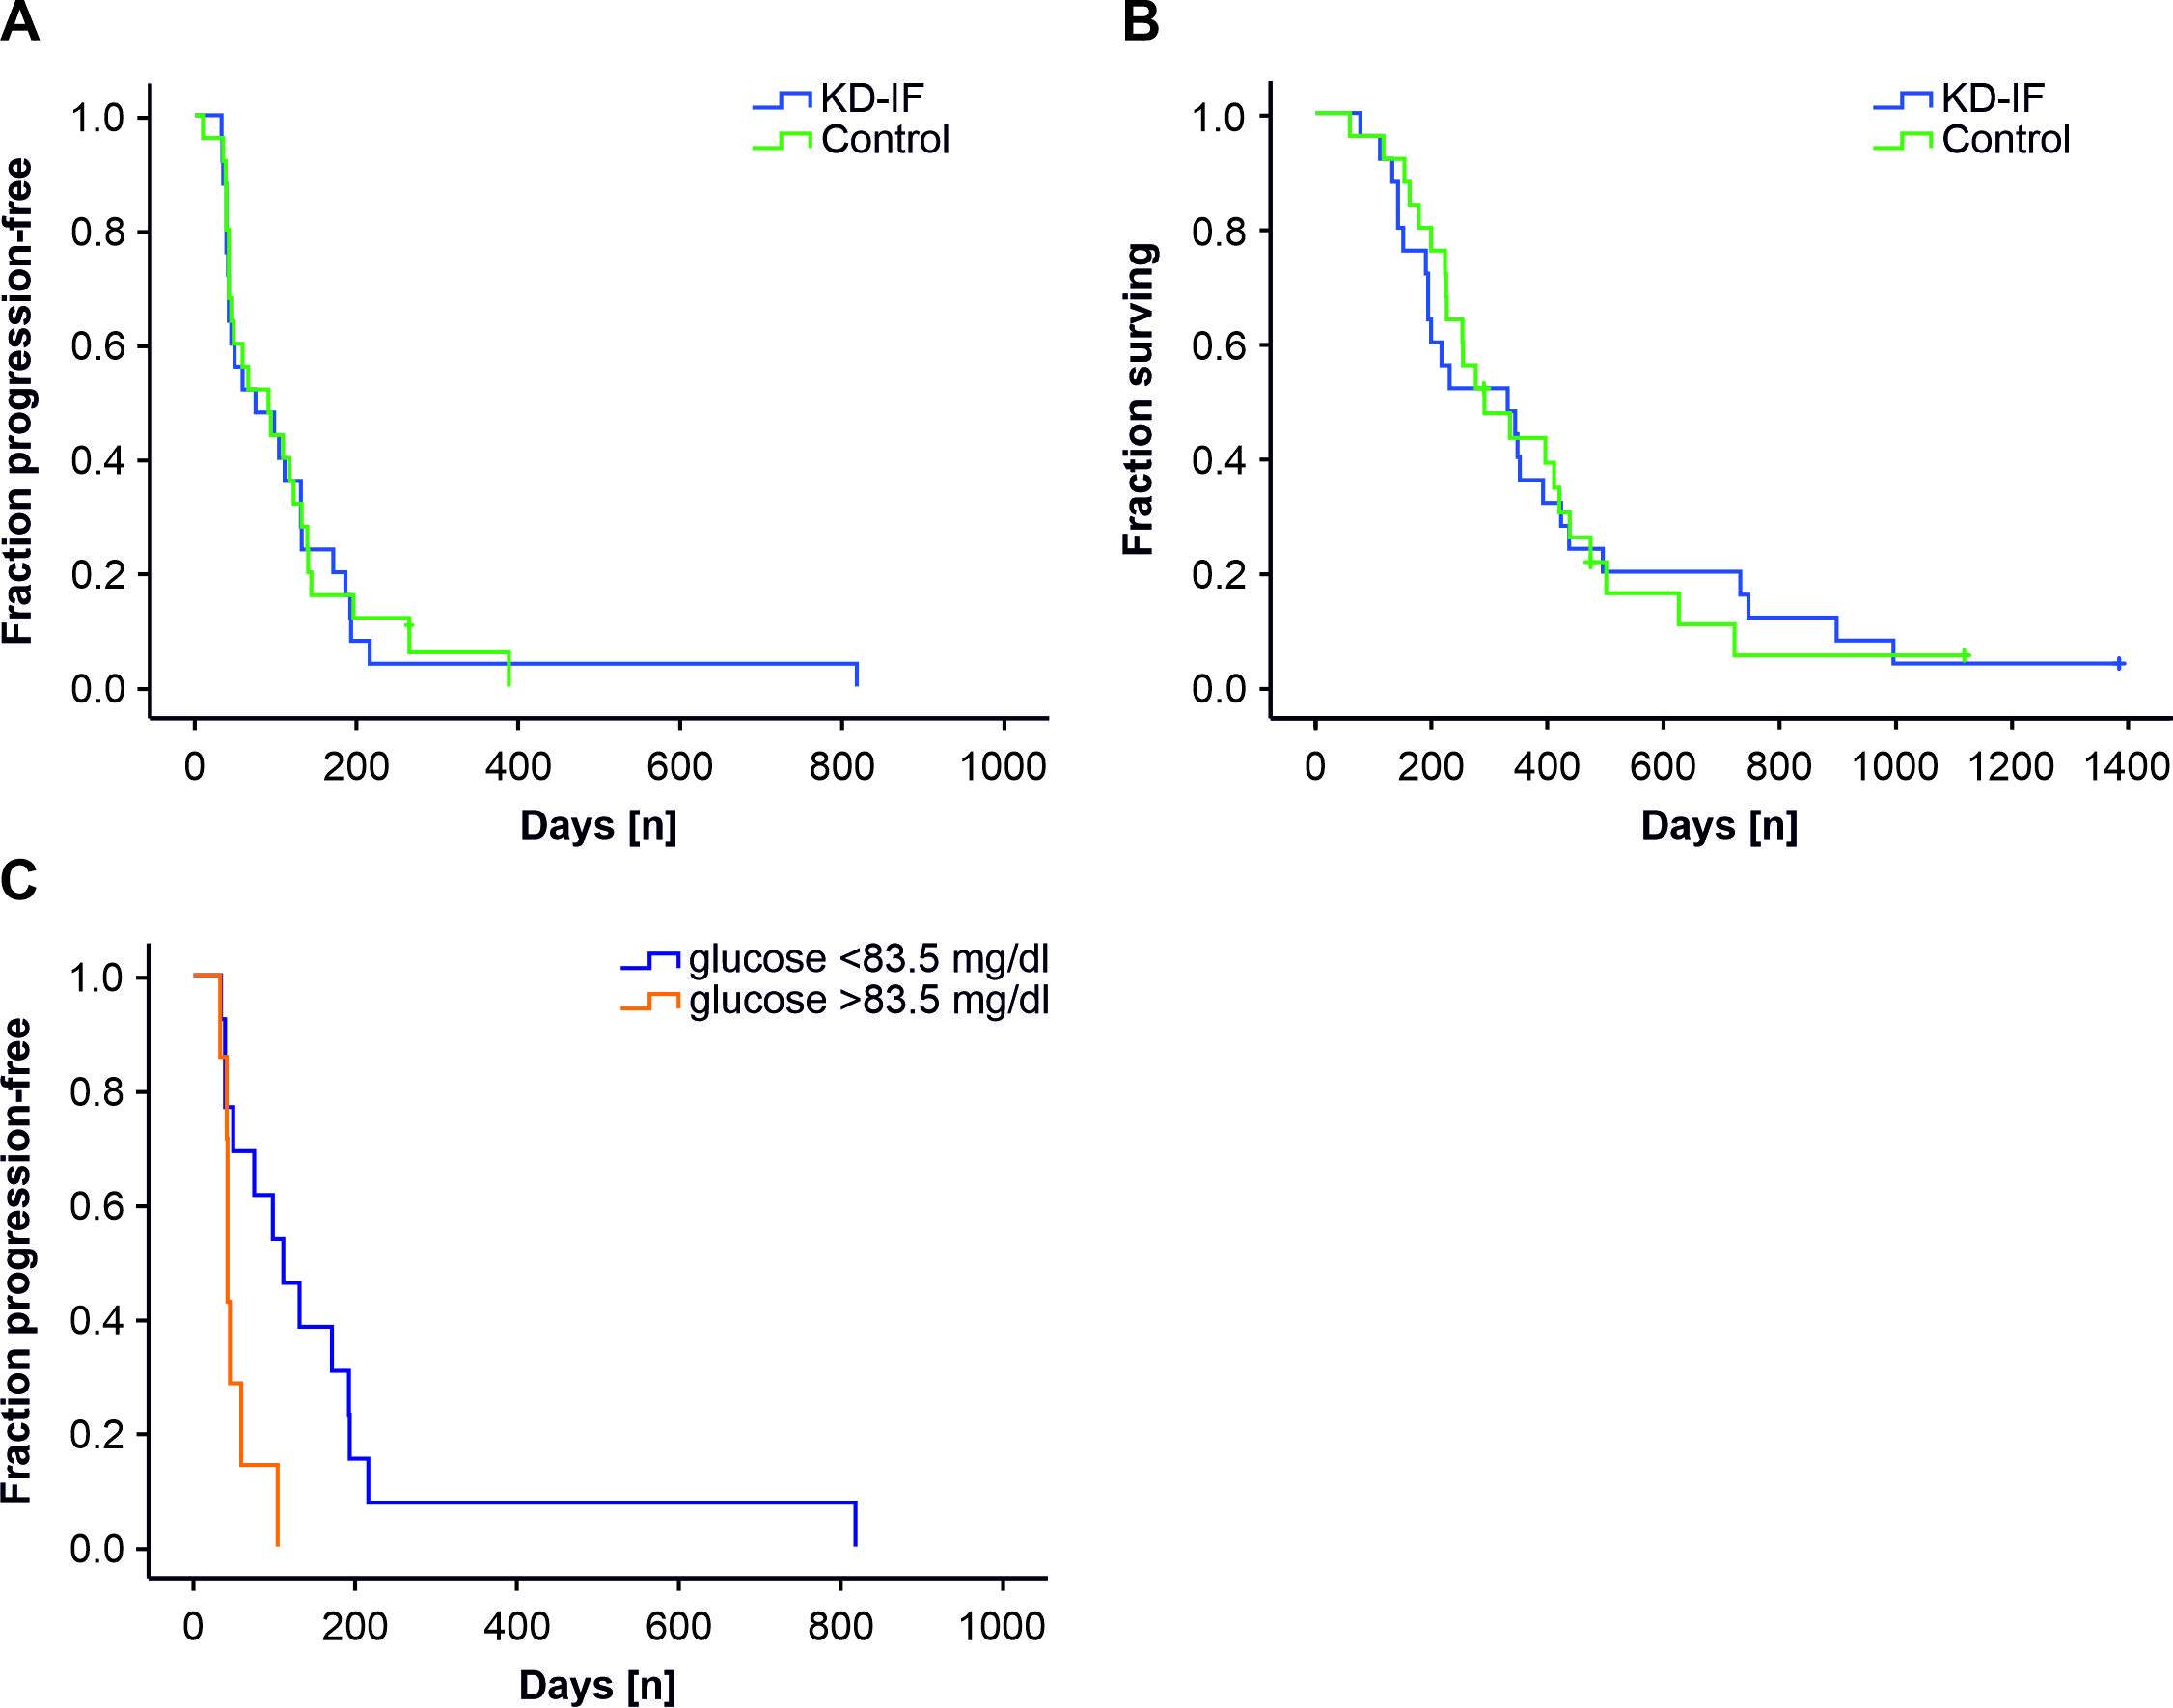


(A) Analysis of the intention to treat population (n = 50) revealed no significant difference for PFS with mean PFS of 122 days for KD-IF (95%CI 61–184) and PFS of 111 days for SD (95%CI 73–149) (p =0.845). (B) There was no difference for OS with mean OS of 394 days for KD-IF (95%CI 270-519) and OS of 374 days for SD (95%CI 274-473) (p =0.965). (C) Unplanned sub-analysis of the patients treated as set by protocol in the KD-IF group (n = 20). When comparing the patients with a glucose on day 6 (the last day of fasting) below the median of 83.5mg/dl to the patients above the median there was a statistically significant longer mean PFS of 167 days (95%CI 55-279) in comparison to 52 days (95%CI 34-70) (p =0.014).

**Supplement Figure 2: Health-related quality of life**


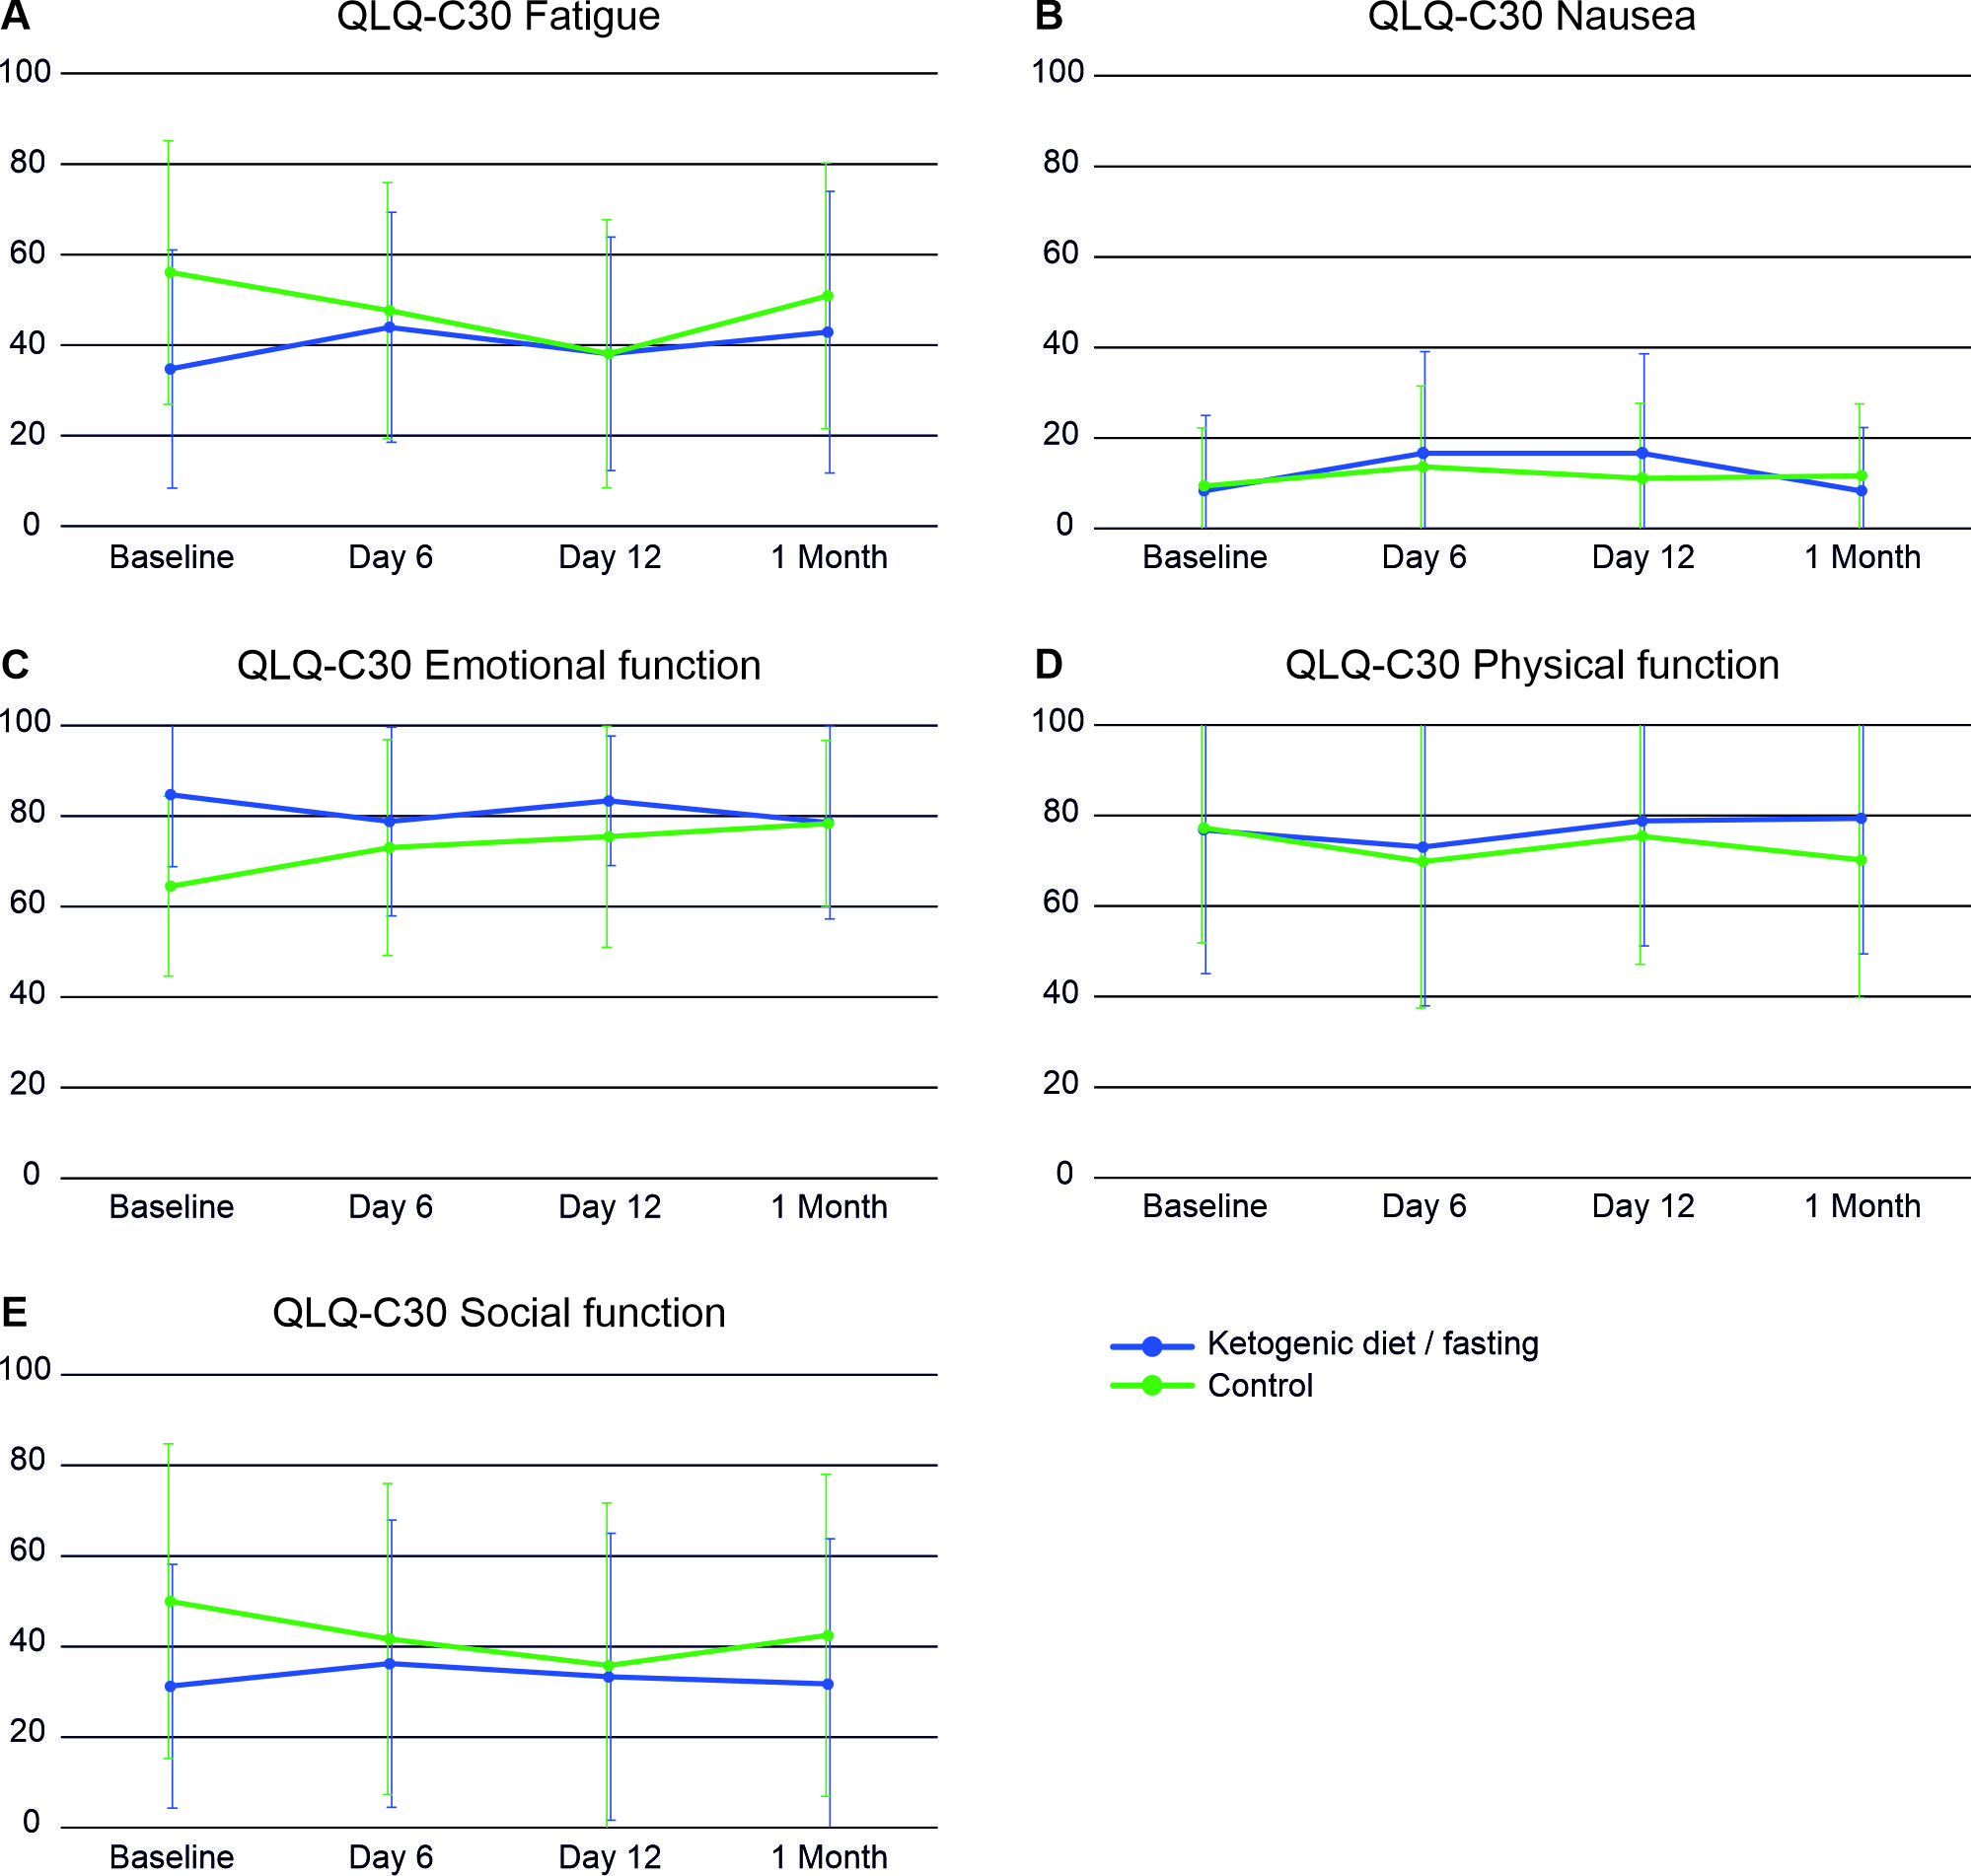


Aggregated scores of EORTC QLQ-C30. Mean values with standard deviation are indicated. For (A) and (B) a high score represents a high symptom burden while for (C-E), a high score represents a high functional level.

**Supplement Figure 3: Progression free survival by Body Mass Index**


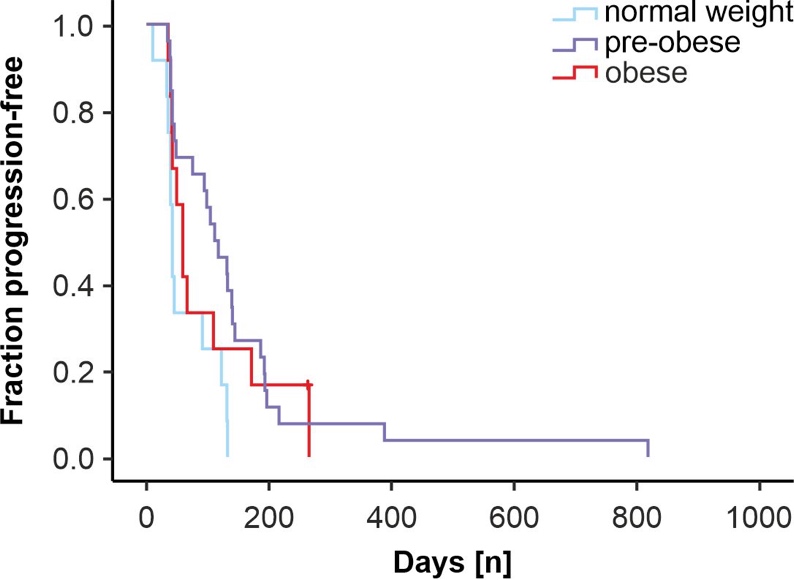


Analysis of the intention to treat population (n = 50) revealed the shortest progression free survival for the normal weight patients of mean 63 days (95%CI 38.9 – 87.8) compared to overweight patients with mean 146 days (95%CI 85.3–207.0, p =0.004) and obese patients with 100 days (95%CI 51–148.9, p =0.162).

**Supplement Figure 4: Weight loss**


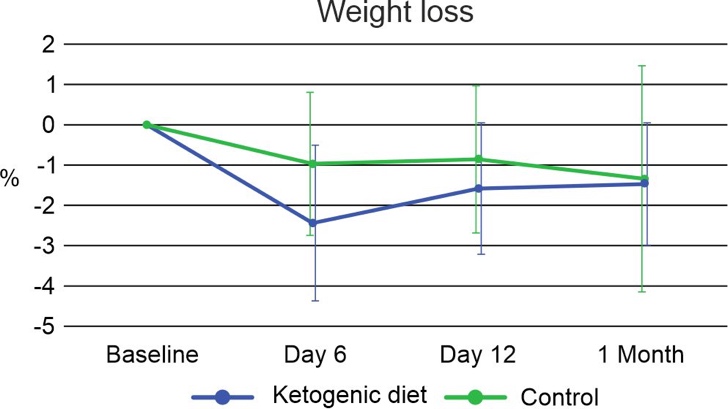


In the per protocol treated cohort mean weight at baseline was 85.7±11.9kg for KD-IF and 86.6±13.9kg for SD. Patients in the KD-IF group treated by protocol lost a median of 2.2% (mean absolute weight loss -2.2±1.9kg) of their body weight until day 6 in contrast to the SD group which lost a median of 0.7% (mean absolute weight loss -0.9±1.5kg) (*p* =0.014). The patients of the KD-IF group did not completely regain their weight with a median of -1.6% at day 12 and still -1.5% at the follow-up after one month.

**Supplement Table 1: Composition of Tavarlin ketogenic drink**

| **Average Content** | **per 100 ml** |
| --- | --- |
| Energy (kcal)  (kJ) | 181  748 |
| Fat (g)  - of which saturated fatty acids  - of which monounsaturated fatty acids  - of which polyunsaturated fatty acids | 14.4  2.4  5.7  6.4 |
| Carbohydrates (g)  - of which sugar | 1,2  0,5 |
| Fiber (g) | 2.8 |
| Protein (g) | 8.9 |

Ingredients: Water, rapeseed oil, pea protein, fiber: corn dextrin, medium-chain triglycerides (MCT), calcium phosphate, magnesium hydroxide, chromium chloride, iron gluconate, potassium chloride, potassium citrate, potassium iodate, potassium lactate, copper gluconate, manganese sulfate, Sodium selenate, zinc gluconate, sodium L-ascorbate, D-biotin, cyanocobalamin, menaquinone, nicotinamide, calcium-D-pantothenate, phylloquinone, pteroylglutamic acid, pyridoxine hydrochloride, retinyl acetate, riboflavin, DL-alpha-tocopheryl acetate, Cholecalciferol, vitamin E-rich oil from palm fruit / annatto, choline tartrate, L-carnitine, maltodextrin, aroma, emulsifier: mono- and diglycerides of fatty acids.

**Supplement table 2: Diet example of two patients during the days of calorie restricted ketogenic diet**

| **Day** | **Breakfast** | **Lunch** | **Dinner** | **Snack** | **Macronutrients** |
| --- | --- | --- | --- | --- | --- |
| 1 | ½ recipe 1: scrambled eggs with chives and bacon | 1 Tavarlin-Drink | ½ recipe 1: scrambled eggs with chives and bacon | - 1 Tavarlin-Drink - recipe 3: quark with raspberries | 23,7 kcal/kg/d  Protein: 21,6 % Fat: 70,5 % Carbohydrate: 10,3 % |
| 2 | ½ recipe 1: scrambled eggs with chives and bacon | - 1 Tavarlin-Drink  - ½ recipe 8: Chicken Curry | ½ recipe 8: Chicken Curry | 1 Tavarlin-Drink |
| 3 | ½ recipe 1: scrambled eggs with chives and bacon | - 1 Tavarlin-Drink  - ½ recipe 8: Chicken Curry | ½ recipe 8:  Chicken Curry | 1 Tavarlin-Drink |
| 7 | ½ recipe 1: scrambled eggs with chives and bacon | 1 Tavarlin-Drink | Recipe 7: Salad with chicken | 1 Tavarlin-Drink | 23,6 kcal/kg/d  Protein: 20,8 % Fat: 72,8 %  Carbohydrate: 8,9 % |
| 8 | ½ recipe 1: scrambled eggs with chives and bacon | 1 Tavarlin-Drink | Recipe 8: Chicken Curry | 1 Tavarlin-Drink |
| 9 | ½ recipe 1: scrambled eggs with chives and bacon | 1 Tavarlin-Drink | Recipe 7: Salad with chicken | 1 Tavarlin-Drink |
|  | | | | | |
| **Day** | **Breakfast** | **Lunch** | **Dinner** | **Snack** | **Macronutrients** |
| 1 | 1 Tavarlin-Drink | - 1 Tavarlin-Drink  - Recipe 1:  scrambled eggs with chives and bacon | 1 Tavarlin-Drink |  | 18,3 kcal/kg/d  Protein: 19 %  Fat: 75,3 %  Carbohydrate: 9,1 % |
| 2 | 1 Tavarlin-Drink | - 1 Tavarlin-Drink  - Recipe 1:  scrambled eggs with chives and bacon | 1 Tavarlin-Drink |  |
| 3 | 1 Tavarlin-Drink | - 1 Tavarlin-Drink  - Recipe 7: Salad with chicken | 1 Tavarlin-Drink |  |
| 7 | 1 Tavarlin-Drink | -1 Tavarlin-Drink  - recipe 6: Salad with cheese, olives and egg | 1 Tavarlin-Drink |  | 19,1 kcal/kg/d  Protein: 17,4 %  Fat: 78,1 %  Carbohydrate: 7,5 % |
| 8 | 1 Tavarlin-Drink | - 1 Tavarlin-Drink  - Recipe10:  Cauliflower Curry | 1 Tavarlin-Drink |  |
| 9 | 1 Tavarlin-Drink | - 1 Tavarlin-Drink  - Recipe 8: Chicken Curry | 1 Tavarlin-Drink |  |
